# Supplementary material for: Characterization of Novel Sorghum brown midrib Mutants from an EMS-Mutagenized Population
Source: PubMed Central journal article supplement (PMC4232537; doi:10.1534/g3.114.014001), 2014-09-02
Supplement: supp_g3.114.014001_014001SI.pdf [file supp_g3.114.014001_014001SI.pdf]

## Characterization of novel sorghum *brown midrib* mutants from an EMS-mutagenized population

Scott E. Sattler<sup>\*,§</sup>, Ana Saballos<sup>\*\*,1</sup>, Zhanguo Xin<sup>§§</sup>, Deanna L. Funnell-Harris<sup>\*,¶</sup>, Wilfred Vermerris<sup>€</sup> and Jeffrey F. Pedersen<sup>\*,§</sup>

<sup>\*</sup>Grain, Forage and Bioenergy Research Unit, USDA-ARS, Lincoln, NE 68583

<sup>§</sup>Department of Agronomy and Horticulture, University of Nebraska–Lincoln, Lincoln, NE 68583

<sup>\*\*</sup>Agronomy Department and Genetics Institute, University of Florida, Gainesville, FL 32610

<sup>§§</sup>Plant Stress and Germplasm Development Unit, USDA-ARS, Lubbock, TX 79415

<sup>¶</sup>Department of Plant Pathology, University of Nebraska–Lincoln, Lincoln, NE 68583

<sup>€</sup>Department of Microbiology & Cell Science and Genetics Institute, University of Florida, Gainesville, FL 32610

<sup>1</sup>Present Address: Chromatin Inc., Alachua, FL 32615

<sup>2</sup>The U.S. Department of Agriculture (USDA) prohibits discrimination in all its programs and activities on the basis of race, color, national origin, age, disability, and where applicable, sex, marital status, familial status, parental status, religion, sexual orientation, genetic information, political beliefs, reprisal, or because all or part of an individual's income is derived from any public assistance program. (Not all prohibited bases apply to all programs.) Persons with disabilities who require alternative means for communication of program information (Braille, large print, audiotape, etc.) should contact USDA's TARGET Center at (202) 720-2600 (voice and TDD). To file a complaint of discrimination, write to USDA, Director, Office of Civil Rights, 1400 Independence Avenue, S.W., Washington, D.C. 20250-9410, or call (800) 795-3272 (voice) or (202) 720-6382 (TDD). USDA is an equal opportunity provider and employer.

Corresponding Author: Scott Sattler, Grain, Forage and Bioenergy Research Unit USDA-ARS, 137 Keim Hall, East Campus UNL, Lincoln, NE 68583-0937; phone: 402-472-5987; FAX: 402-472-4020; e-mail: [Scott.Sattler@ars.usda.gov](mailto:Scott.Sattler@ars.usda.gov)

DOI: 10.1534/g3.114.014001

**Table S1. Calibration statistics for NIRS<sup>†</sup> prediction of CP, NDF, ADF, ADL, Ash, and Total Carbon.**

| Trait           | Math treatment <sup>‡</sup> | Calibration<br>R <sup>2</sup> | SEC                           | SECV  | SEP   | Validation<br>R <sup>2</sup> |
|-----------------|-----------------------------|-------------------------------|-------------------------------|-------|-------|------------------------------|
|                 |                             |                               | -----g kg <sup>-1</sup> ----- |       |       |                              |
| CP              | 2,8,6,1                     | 0.989                         | 0.228                         | 0.303 | 0.517 | 0.982                        |
| NDF             | 4,10,10,1                   | 0.939                         | 1.371                         | 1.563 | 2.231 | 0.882                        |
| ADF             | 3,10,10,1                   | 0.955                         | 0.852                         | 1.107 | 1.164 | 0.931                        |
| ADL             | 3,5,5,1                     | 0.882                         | 0.373                         | 0.606 | 0.577 | 0.805                        |
| Ash             | 3,10,10,1                   | 0.963                         | 0.476                         | 0.662 | 0.449 | 0.937                        |
| Total<br>Carbon | 3,5,5,1                     | 0.918                         | 0.277                         | 0.517 | 0.192 | 0.922                        |

<sup>†</sup>Abbreviations: NIRS=near-infrared spectroscopy, CP=crude protein, NDF=neutral detergent fiber, ADF=acid detergent fiber, ADL=acid detergent lignin, SEC=standard error calibration, SECV=standard error cross validation, SEP=Standard Error of Prediction of validation set.

<sup>‡</sup>Math treatments used by NIRS software = derivative number, gap (nm over which derivative is calculated), smooth (number of points over which data is smoothed), second smooth (number of points).

**Table S2. Midrib phenotype and genotypes of 26 non-*bmr* lines based on results of test crosses with *bmr2*, *bmr6*, and *bmr12* tester lines.**

| Line | Mutant Phenotype | Tester Line          |                             |                              | Mutant locus |
|------|------------------|----------------------|-----------------------------|------------------------------|--------------|
|      |                  | AOK11<br><i>bmr2</i> | AN603 ATx623<br><i>bmr6</i> | AN604 ATx623<br><i>bmr12</i> |              |
| 4    | WT               | WT                   | WT                          | WT                           |              |
| 25   | WT               | WT                   | WT                          | WT                           |              |
| 39   | WT               | -                    | WT                          | WT                           |              |
| 40   | WT               | WT                   | WT                          | WT                           |              |
| 41   | <i>bmr</i>       | WT                   | WT                          | WEAK                         | inconclusive |
| 163  | WT               | WT                   | WT                          | WT                           |              |
| 247  | WT               | WT                   | WT                          | WT                           |              |
| 371  | WT               | WT                   | WT                          | WT                           |              |
| 372  | WT               | WT                   | WT                          | WT                           |              |
| 485  | WT               | WT                   | WT                          | WT                           |              |
| 492  | WT               | WT                   | WT                          | WT                           |              |
| 557  | WT               | WT                   | WT                          | WT                           |              |
| 666  | WEAK             | WT                   | WT                          | WT                           | inconclusive |
| 706  | WT               | WT                   | WEAK                        | WT                           | inconclusive |
| 924  | WT               | WT                   | WT                          | WT                           |              |
| 934  | WT               | WT                   | WT                          | WT                           |              |
| 1057 | WT               | WT                   | WT                          | WT                           |              |
| 1074 | WT               | WT                   | WT                          | WT                           |              |
| 1402 | WT               | WT                   | WT                          | WT                           |              |
| 1492 | WT               | WT                   | WT                          | WT                           |              |
| 1593 | WT               | WT                   | WT                          | WT                           |              |
| 1605 | WT               | WT                   | WT                          | WT                           |              |
| 1614 | WT               | WT                   | WT                          | WT                           |              |
| 1634 | WT               | WT                   | WT                          | WT                           |              |
| 1668 | WT               | WT                   | WT                          | WT                           |              |
| 1827 | WT               | WT                   | WT                          | WT                           |              |

The F<sub>1</sub> individuals, mutant lines, and check lines were visually classified as being *brown midrib* (*bmr*) or wild-type (WT) phenotype (See Materials and Methods). Based upon the test-crosses, loci and alleles were designated, which appear in the far right column.

**Table S3. Evaluation of the agronomic traits for the mutant lines**

| Line                | Stand Count (plants/m) |             |              | Time to 50% Anthesis<br>(days after planting) |       |        | Height (cm)   |              |               | Yield (T/ha) |              |              |
|---------------------|------------------------|-------------|--------------|-----------------------------------------------|-------|--------|---------------|--------------|---------------|--------------|--------------|--------------|
|                     | Ismean                 | Lower       | Upper        | Ismean                                        | Lower | Upper  | Ismean        | Lower        | Upper         | Ismean       | Lower        | Upper        |
| BTx623 <sup>T</sup> | 14.13                  | 10.31       | 17.94        | 73.38                                         | 52.66 | 94.09  | 153.13        | 135.79       | 170.46        | 17.50        | 16.07        | 18.94        |
| BTx623 <sup>N</sup> | 16.63                  | 12.95       | 20.30        | 72.75                                         | 52.28 | 93.22  | 148.13        | 128.63       | 167.62        | 17.26        | 14.19        | 20.34        |
| RTx430              | 13.13                  | 9.49        | 16.76        | 75.75                                         | 55.17 | 96.34  | 123.75        | 103.13       | 144.37        | 16.63        | 14.83        | 18.44        |
| BWheatland          | 14.75                  | 10.51       | 18.99        | 73.88                                         | 53.38 | 94.37  | <b>110.63</b> | <b>90.74</b> | <b>130.51</b> | 13.71        | 12.34        | 15.08        |
| BTx623 <i>bmr6</i>  | 17.38                  | 13.07       | 21.68        | 74.00                                         | 53.31 | 94.69  | 125.00        | 105.47       | 144.53        | 13.66        | 10.59        | 16.72        |
| BTx623 <i>bmr12</i> | 15.75                  | 12.03       | 19.47        | 76.63                                         | 56.57 | 96.68  | 131.88        | 111.06       | 152.69        | 15.72        | 14.09        | 17.35        |
| OK11 <i>bmr2</i>    | 15.13                  | 11.48       | 18.77        | 78.00                                         | 57.39 | 98.61  | 120.00        | 101.98       | 138.02        | <b>12.02</b> | <b>10.09</b> | <b>13.94</b> |
| <i>bmr2-2</i>       | 10.00                  | 6.26        | 13.74        | 78.88                                         | 58.83 | 98.92  | 128.13        | 108.97       | 147.28        | <b>7.12</b>  | <b>6.15</b>  | <b>8.09</b>  |
| <i>bmr6-23</i>      | 15.13                  | 11.24       | 19.01        | 78.50                                         | 58.65 | 98.35  | <b>96.25</b>  | <b>79.52</b> | <b>112.98</b> | <b>5.23</b>  | <b>4.25</b>  | <b>6.21</b>  |
| <i>bmr6-31</i>      | 10.50                  | 6.85        | 14.15        | 77.50                                         | 57.40 | 97.60  | <b>108.13</b> | <b>91.65</b> | <b>124.60</b> | <b>5.20</b>  | <b>4.23</b>  | <b>6.17</b>  |
| <i>bmr6-32</i>      | 12.88                  | 9.25        | 16.50        | 78.00                                         | 57.60 | 98.40  | 115.63        | 94.34        | 136.91        | <b>9.76</b>  | <b>8.68</b>  | <b>10.83</b> |
| <i>bmr6-45</i>      | 10.63                  | 7.01        | 14.24        | 78.13                                         | 57.73 | 98.52  | <b>114.38</b> | <b>94.17</b> | <b>134.58</b> | <b>6.17</b>  | <b>5.16</b>  | <b>7.18</b>  |
| <i>bmr6-307</i>     | <b>6.25</b>            | <b>2.47</b> | <b>10.03</b> | 81.63                                         | 61.29 | 101.96 | <b>112.50</b> | <b>94.06</b> | <b>130.94</b> | <b>3.48</b>  | <b>1.99</b>  | <b>4.96</b>  |
| <i>bmr6-741</i>     | 16.50                  | 12.86       | 20.14        | 79.50                                         | 59.11 | 99.89  | 128.13        | 108.96       | 147.29        | <b>10.53</b> | <b>9.11</b>  | <b>11.96</b> |
| <i>bmr6-971</i>     | 14.88                  | 11.02       | 18.73        | 79.00                                         | 58.69 | 99.31  | 125.00        | 105.80       | 144.20        | <b>11.72</b> | <b>10.47</b> | <b>12.98</b> |
| <i>bmr6-1103</i>    | 13.13                  | 9.36        | 16.89        | 79.13                                         | 59.06 | 99.19  | <b>91.88</b>  | <b>71.92</b> | <b>111.83</b> | <b>8.26</b>  | <b>6.88</b>  | <b>9.64</b>  |
| <i>bmr6-1277</i>    | 10.75                  | 6.40        | 15.10        | 76.88                                         | 56.53 | 97.22  | <b>104.38</b> | <b>83.20</b> | <b>125.55</b> | <b>7.95</b>  | <b>6.66</b>  | <b>9.24</b>  |
| <i>bmr12-30</i>     | 8.50                   | 4.83        | 12.17        | 86.63                                         | 66.48 | 106.77 | 118.75        | 101.52       | 135.98        | <b>6.51</b>  | <b>5.48</b>  | <b>7.54</b>  |
| <i>bmr12-34</i>     | 12.88                  | 8.96        | 16.79        | 82.83                                         | 62.43 | 103.23 | 133.13        | 115.58       | 150.67        | <b>8.45</b>  | <b>7.40</b>  | <b>9.49</b>  |
| <i>bmr12-35</i>     | 16.25                  | 12.48       | 20.02        | 74.13                                         | 53.57 | 94.68  | 132.50        | 112.12       | 152.88        | <b>12.95</b> | <b>11.51</b> | <b>14.38</b> |
| <i>bmr12-820</i>    | 11.21                  | 7.49        | 14.93        | 89.37                                         | 71.06 | 107.67 | 126.83        | 107.39       | 146.26        | <b>4.83</b>  | <b>3.53</b>  | <b>6.13</b>  |
| <i>bmr29</i>        | 12.25                  | 8.33        | 16.17        | 75.50                                         | 54.86 | 96.14  | 133.13        | 116.21       | 150.04        | <b>7.30</b>  | <b>6.34</b>  | <b>8.27</b>  |
| <i>bmr30</i>        | <b>5.25</b>            | <b>0.57</b> | <b>9.93</b>  | 84.00                                         | 64.28 | 103.72 | 128.75        | 111.38       | 146.12        | <b>4.77</b>  | <b>3.53</b>  | <b>6.00</b>  |
| <i>bmr31</i>        | 9.21                   | 5.22        | 13.20        | 84.87                                         | 65.34 | 104.39 | <b>69.33</b>  | <b>52.75</b> | <b>85.91</b>  | <b>2.30</b>  | <b>-0.43</b> | <b>5.03</b>  |
| <i>bmr32-1</i>      | 7.88                   | 3.84        | 11.91        | 82.25                                         | 62.52 | 101.98 | 126.88        | 109.42       | 144.33        | <b>6.91</b>  | <b>4.97</b>  | <b>8.86</b>  |
| <i>bmr32-2</i>      | 11.88                  | 8.15        | 15.60        | 76.13                                         | 55.43 | 96.82  | <b>115.00</b> | <b>97.51</b> | <b>132.49</b> | <b>8.26</b>  | <b>7.26</b>  | <b>9.27</b>  |
| <i>bmr32-3</i>      | <b>6.25</b>            | <b>2.46</b> | <b>10.04</b> | 82.75                                         | 63.49 | 102.01 | 117.50        | 97.39        | 137.61        | <b>3.49</b>  | <b>1.69</b>  | <b>5.29</b>  |
| 4                   | 12.25                  | 8.61        | 15.89        | 78.13                                         | 57.62 | 98.63  | 125.63        | 106.95       | 144.30        | <b>9.99</b>  | <b>8.89</b>  | <b>11.09</b> |
| 25                  | 11.88                  | 8.23        | 15.52        | 87.40                                         | 69.54 | 105.26 | 148.13        | 131.07       | 165.18        | <b>9.75</b>  | <b>7.53</b>  | <b>11.96</b> |
| 39                  | 8.00                   | 4.05        | 11.95        | 84.50                                         | 63.84 | 105.16 | <b>100.63</b> | <b>82.12</b> | <b>119.13</b> | <b>6.63</b>  | <b>5.34</b>  | <b>7.92</b>  |
| 40                  | 8.63                   | 4.92        | 12.33        | 78.75                                         | 58.25 | 99.25  | 126.88        | 106.25       | 147.50        | <b>10.62</b> | <b>9.55</b>  | <b>11.69</b> |
| 41                  | 13.75                  | 10.03       | 17.47        | 75.50                                         | 55.20 | 95.80  | 116.88        | 97.06        | 136.69        | <b>9.71</b>  | <b>8.71</b>  | <b>10.70</b> |
| 163                 | 17.38                  | 13.69       | 21.06        | 80.75                                         | 60.29 | 101.21 | 122.50        | 102.23       | 142.77        | <b>8.61</b>  | <b>7.63</b>  | <b>9.60</b>  |
| 247                 | 6.71                   | 2.35        | 11.07        | 87.20                                         | 66.97 | 107.43 | <b>83.49</b>  | <b>65.20</b> | <b>101.79</b> | <b>2.13</b>  | <b>1.11</b>  | <b>3.14</b>  |
| 371                 | 14.00                  | 10.19       | 17.81        | 79.13                                         | 59.04 | 99.21  | 149.38        | 132.40       | 166.35        | 15.07        | 13.29        | 16.86        |
| 372                 | 6.88                   | 2.55        | 11.20        | 76.25                                         | 56.22 | 96.28  | 138.13        | 118.44       | 157.81        | <b>12.12</b> | <b>10.71</b> | <b>13.53</b> |
| 485                 | 13.38                  | 9.63        | 17.12        | 75.75                                         | 55.05 | 96.45  | 144.38        | 124.26       | 164.49        | <b>11.09</b> | <b>9.89</b>  | <b>12.28</b> |
| 492                 | 10.75                  | 7.11        | 14.39        | 85.25                                         | 65.89 | 104.61 | <b>107.50</b> | <b>87.33</b> | <b>127.67</b> | <b>5.89</b>  | <b>4.93</b>  | <b>6.84</b>  |
| 557                 | 9.75                   | 6.10        | 13.40        | 90.63                                         | 70.09 | 111.16 | 130.00        | 113.36       | 146.64        | <b>7.92</b>  | <b>6.95</b>  | <b>8.90</b>  |
| 666                 | 14.75                  | 10.92       | 18.58        | 77.75                                         | 57.44 | 98.06  | 134.38        | 113.26       | 155.49        | <b>9.48</b>  | <b>7.39</b>  | <b>11.57</b> |

|      |             |             |             |       |       |        |               |              |               |              |              |              |
|------|-------------|-------------|-------------|-------|-------|--------|---------------|--------------|---------------|--------------|--------------|--------------|
| 706  | 7.50        | 3.85        | 11.15       | 84.13 | 63.88 | 104.37 | <b>108.75</b> | <b>89.78</b> | <b>127.72</b> | <b>4.28</b>  | <b>3.10</b>  | <b>5.46</b>  |
| 924  | 15.00       | 11.35       | 18.65       | 76.13 | 55.58 | 96.67  | <b>99.38</b>  | <b>80.46</b> | <b>118.29</b> | <b>9.19</b>  | <b>7.58</b>  | <b>10.80</b> |
| 934  | 8.25        | 3.90        | 12.60       | 88.38 | 69.42 | 107.33 | <b>103.13</b> | <b>82.20</b> | <b>124.05</b> | <b>2.76</b>  | <b>0.99</b>  | <b>4.53</b>  |
| 1057 | 10.38       | 6.72        | 14.03       | 75.38 | 55.08 | 95.67  | 119.38        | 99.14        | 139.61        | <b>6.38</b>  | <b>5.43</b>  | <b>7.33</b>  |
| 1074 | 14.25       | 10.32       | 18.18       | 74.88 | 54.21 | 95.54  | 135.00        | 113.92       | 156.08        | <b>13.39</b> | <b>11.81</b> | <b>14.97</b> |
| 1402 | 9.75        | 5.81        | 13.69       | 82.38 | 62.62 | 102.13 | 117.50        | 96.89        | 138.11        | <b>6.00</b>  | <b>4.50</b>  | <b>7.51</b>  |
| 1492 | <b>4.75</b> | <b>1.06</b> | <b>8.44</b> | 79.50 | 59.00 | 100.00 | 121.25        | 100.90       | 141.60        | <b>4.45</b>  | <b>1.78</b>  | <b>7.11</b>  |
| 1593 | 13.50       | 9.01        | 17.99       | 87.71 | 68.09 | 107.32 | <b>90.63</b>  | <b>74.61</b> | <b>106.64</b> | <b>3.81</b>  | <b>2.80</b>  | <b>4.81</b>  |
| 1605 | 11.13       | 7.30        | 14.95       | 77.63 | 57.28 | 97.97  | 166.25        | 146.41       | 186.09        | <b>9.83</b>  | <b>8.51</b>  | <b>11.15</b> |
| 1614 | 11.00       | 7.18        | 14.82       | 77.13 | 56.64 | 97.61  | 128.75        | 109.01       | 148.49        | <b>8.37</b>  | <b>7.17</b>  | <b>9.58</b>  |
| 1634 | 8.13        | 4.46        | 11.79       | 86.63 | 66.51 | 106.74 | <b>99.38</b>  | <b>78.94</b> | <b>119.81</b> | <b>3.79</b>  | <b>2.84</b>  | <b>4.73</b>  |
| 1668 | 11.13       | 7.51        | 14.74       | 79.38 | 59.43 | 99.32  | <b>113.13</b> | <b>96.02</b> | <b>130.23</b> | <b>7.17</b>  | <b>6.14</b>  | <b>8.20</b>  |
| 1827 | 11.50       | 7.87        | 15.13       | 79.00 | 58.57 | 99.43  | 129.38        | 110.83       | 147.92        | <b>7.08</b>  | <b>5.80</b>  | <b>8.37</b>  |

Measurement of these traits is as described in Materials and Methods. Yield is defined as the total above ground biomass. Least Squares Means (lsmean) for mutant and check lines were generated, and means of all variables were ranked from highest (Upper) to lowest (Lower). **Bold text** indicates values that were significantly different ( $P \leq 0.20$ ) from the values of BTx623<sup>T</sup>, the line used for mutagenesis. Additional details of the statistical analysis are described in Materials and Methods. BTx623<sup>N</sup> is the line maintained by ARS in Lincoln, NE, which was included for comparison.

**Table S4. NIRS prediction for NDF, ADF and ADL of the mutant lines**

| Line                | NDF (%)      |              |              | ADF (%)      |              |              | ADL (%)     |             |             |
|---------------------|--------------|--------------|--------------|--------------|--------------|--------------|-------------|-------------|-------------|
|                     | Ismean       | Lower        | Upper        | Ismean       | Lower        | Upper        | Ismean      | Lower       | Upper       |
| BTx623 <sup>T</sup> | 60.86        | 58.85        | 62.86        | 34.23        | 33.50        | 34.97        | 5.18        | 4.98        | 5.39        |
| BTx623 <sup>N</sup> | 61.48        | 59.48        | 63.49        | 34.52        | 33.76        | 35.28        | 5.34        | 5.13        | 5.54        |
| RTx430              | 64.41        | 62.40        | 66.42        | <b>36.41</b> | <b>35.69</b> | <b>37.13</b> | 5.11        | 4.92        | 5.31        |
| BWheatland          | 64.03        | 62.02        | 66.03        | <b>36.04</b> | <b>35.32</b> | <b>36.76</b> | 5.13        | 4.93        | 5.33        |
| BTx623 <i>bmr6</i>  | 60.76        | 58.75        | 62.76        | 33.76        | 32.97        | 34.54        | <b>4.28</b> | <b>4.07</b> | <b>4.49</b> |
| BTx623 <i>bmr12</i> | 62.68        | 60.68        | 64.69        | 34.60        | 33.81        | 35.39        | <b>4.09</b> | <b>3.88</b> | <b>4.31</b> |
| OK11 <i>bmr2</i>    | <b>64.79</b> | <b>62.78</b> | <b>66.79</b> | 35.53        | 34.79        | 36.27        | <b>4.05</b> | <b>3.85</b> | <b>4.25</b> |
| <i>bmr2-2</i>       | 58.84        | 56.84        | 60.84        | <b>31.96</b> | <b>31.22</b> | <b>32.70</b> | <b>3.67</b> | <b>3.47</b> | <b>3.88</b> |
| <i>bmr6-23</i>      | 60.84        | 58.83        | 62.85        | 32.82        | 32.13        | 33.51        | <b>4.59</b> | <b>4.40</b> | <b>4.77</b> |
| <i>bmr6-31</i>      | 59.10        | 57.09        | 61.11        | <b>31.19</b> | <b>30.49</b> | <b>31.89</b> | <b>3.77</b> | <b>3.58</b> | <b>3.97</b> |
| <i>bmr6-32</i>      | 61.02        | 59.02        | 63.02        | 33.05        | 32.31        | 33.78        | <b>3.82</b> | <b>3.62</b> | <b>4.02</b> |
| <i>bmr6-45</i>      | <b>54.98</b> | <b>52.98</b> | <b>56.99</b> | <b>29.30</b> | <b>28.60</b> | <b>30.00</b> | <b>3.72</b> | <b>3.53</b> | <b>3.91</b> |
| <i>bmr6-307</i>     | 58.15        | 56.14        | 60.15        | <b>29.13</b> | <b>28.35</b> | <b>29.91</b> | <b>4.30</b> | <b>4.09</b> | <b>4.51</b> |
| <i>bmr6-741</i>     | 59.88        | 57.87        | 61.88        | <b>32.49</b> | <b>31.77</b> | <b>33.20</b> | <b>3.92</b> | <b>3.73</b> | <b>4.12</b> |
| <i>bmr6-971</i>     | 60.14        | 58.14        | 62.15        | <b>32.59</b> | <b>31.84</b> | <b>33.35</b> | <b>3.97</b> | <b>3.77</b> | <b>4.18</b> |
| <i>bmr6-1103</i>    | 59.44        | 57.43        | 61.44        | <b>32.30</b> | <b>31.54</b> | <b>33.06</b> | <b>3.74</b> | <b>3.54</b> | <b>3.95</b> |
| <i>bmr6-1277</i>    | <b>68.66</b> | <b>66.66</b> | <b>70.67</b> | <b>38.56</b> | <b>37.87</b> | <b>39.26</b> | 5.08        | 4.89        | 5.27        |
| <i>bmr12-30</i>     | 61.02        | 59.02        | 63.03        | <b>32.40</b> | <b>31.64</b> | <b>33.16</b> | <b>3.85</b> | <b>3.64</b> | <b>4.05</b> |
| <i>bmr12-34</i>     | 61.52        | 59.52        | 63.53        | 33.25        | 32.47        | 34.03        | <b>3.75</b> | <b>3.53</b> | <b>3.96</b> |
| <i>bmr12-35</i>     | 61.80        | 59.79        | 63.80        | 33.86        | 33.11        | 34.62        | <b>4.61</b> | <b>4.41</b> | <b>4.82</b> |
| <i>bmr12-820</i>    | 58.46        | 56.44        | 60.49        | <b>31.12</b> | <b>30.25</b> | <b>31.98</b> | <b>3.37</b> | <b>3.13</b> | <b>3.60</b> |
| <i>bmr29</i>        | 64.41        | 62.41        | 66.42        | <b>37.32</b> | <b>36.58</b> | <b>38.06</b> | <b>4.65</b> | <b>4.45</b> | <b>4.85</b> |
| <i>bmr30</i>        | 61.29        | 59.28        | 63.30        | <b>32.31</b> | <b>31.51</b> | <b>33.12</b> | <b>4.50</b> | <b>4.28</b> | <b>4.72</b> |
| <i>bmr31</i>        | 60.07        | 58.06        | 62.08        | <b>31.48</b> | <b>30.67</b> | <b>32.29</b> | 4.80        | 4.58        | 5.02        |
| <i>bmr32-1</i>      | 62.34        | 60.33        | 64.34        | 33.52        | 32.78        | 34.26        | <b>4.02</b> | <b>3.82</b> | <b>4.22</b> |
| <i>bmr32-2</i>      | 63.47        | 61.47        | 65.47        | 35.15        | 34.41        | 35.89        | <b>4.34</b> | <b>4.14</b> | <b>4.54</b> |
| <i>bmr32-3</i>      | 59.89        | 57.89        | 61.90        | <b>31.37</b> | <b>30.63</b> | <b>32.10</b> | <b>4.53</b> | <b>4.33</b> | <b>4.74</b> |
| 4                   | 64.05        | 62.05        | 66.06        | <b>35.76</b> | <b>35.01</b> | <b>36.52</b> | 5.51        | 5.30        | 5.71        |
| 25                  | 56.90        | 54.90        | 58.91        | <b>30.60</b> | <b>29.79</b> | <b>31.41</b> | <b>3.64</b> | <b>3.42</b> | <b>3.86</b> |
| 39                  | 61.21        | 59.20        | 63.22        | 32.82        | 32.01        | 33.62        | 4.99        | 4.77        | 5.21        |
| 40                  | 62.45        | 60.44        | 64.45        | 34.33        | 33.57        | 35.09        | 5.47        | 5.26        | 5.68        |
| 41                  | 60.85        | 58.84        | 62.85        | 33.14        | 32.38        | 33.90        | 5.09        | 4.89        | 5.30        |
| 163                 | 62.53        | 60.53        | 64.54        | 34.63        | 33.87        | 35.38        | <b>4.77</b> | <b>4.56</b> | <b>4.98</b> |
| 247                 | 61.51        | 59.50        | 63.53        | 32.73        | 31.90        | 33.57        | 5.20        | 4.97        | 5.43        |
| 371                 | <b>64.94</b> | <b>62.93</b> | <b>66.94</b> | <b>36.61</b> | <b>35.86</b> | <b>37.37</b> | 5.41        | 5.21        | 5.62        |
| 372                 | 60.40        | 58.39        | 62.40        | <b>32.72</b> | <b>31.96</b> | <b>33.48</b> | 5.00        | 4.79        | 5.20        |
| 485                 | 59.26        | 57.26        | 61.27        | 32.88        | 32.15        | 33.62        | <b>4.47</b> | <b>4.27</b> | <b>4.68</b> |
| 492                 | 58.94        | 56.93        | 60.95        | <b>31.68</b> | <b>30.87</b> | <b>32.48</b> | <b>4.29</b> | <b>4.07</b> | <b>4.51</b> |
| 557                 | 59.61        | 57.61        | 61.62        | <b>31.87</b> | <b>31.11</b> | <b>32.63</b> | 4.78        | 4.57        | 4.98        |
| 666                 | <b>65.34</b> | <b>63.33</b> | <b>67.34</b> | <b>36.09</b> | <b>35.37</b> | <b>36.81</b> | <b>4.10</b> | <b>3.90</b> | <b>4.30</b> |

|      |              |              |              |              |              |              |             |             |             |
|------|--------------|--------------|--------------|--------------|--------------|--------------|-------------|-------------|-------------|
| 706  | 59.88        | 57.87        | 61.88        | <b>30.63</b> | <b>29.89</b> | <b>31.37</b> | 5.58        | 5.38        | 5.78        |
| 924  | <b>66.00</b> | <b>64.00</b> | <b>68.01</b> | <b>37.53</b> | <b>36.79</b> | <b>38.27</b> | <b>5.84</b> | <b>5.64</b> | <b>6.04</b> |
| 934  | 62.82        | 60.81        | 64.82        | 33.45        | 32.73        | 34.16        | 5.07        | 4.87        | 5.26        |
| 1057 | 61.66        | 59.66        | 63.67        | 33.60        | 32.86        | 34.33        | <b>4.71</b> | <b>4.51</b> | <b>4.91</b> |
| 1074 | 59.80        | 57.80        | 61.81        | 32.92        | 32.16        | 33.68        | <b>4.75</b> | <b>4.54</b> | <b>4.96</b> |
| 1402 | 57.51        | 55.51        | 59.52        | <b>30.97</b> | <b>30.21</b> | <b>31.73</b> | <b>4.23</b> | <b>4.02</b> | <b>4.44</b> |
| 1492 | 60.98        | 58.97        | 62.99        | <b>32.48</b> | <b>31.67</b> | <b>33.28</b> | 4.93        | 4.71        | 5.16        |
| 1593 | <b>55.73</b> | <b>53.72</b> | <b>57.74</b> | <b>29.59</b> | <b>28.91</b> | <b>30.27</b> | <b>4.14</b> | <b>3.95</b> | <b>4.32</b> |
| 1605 | 57.65        | 55.64        | 59.66        | <b>32.27</b> | <b>31.59</b> | <b>32.95</b> | 5.02        | 4.84        | 5.21        |
| 1614 | 62.41        | 60.41        | 64.41        | 34.75        | 34.00        | 35.51        | <b>5.72</b> | <b>5.51</b> | <b>5.92</b> |
| 1634 | 57.59        | 55.59        | 59.59        | <b>28.78</b> | <b>28.03</b> | <b>29.54</b> | 4.80        | 4.59        | 5.01        |
| 1668 | 59.55        | 57.55        | 61.56        | <b>31.57</b> | <b>30.79</b> | <b>32.35</b> | <b>4.70</b> | <b>4.49</b> | <b>4.91</b> |
| 1827 | <b>56.55</b> | <b>54.55</b> | <b>58.55</b> | <b>30.66</b> | <b>29.92</b> | <b>31.39</b> | <b>4.05</b> | <b>3.85</b> | <b>4.25</b> |

Values for neutral detergent fiber (NDF), acid detergent fiber (ADF), and acid detergent lignin (ADL) concentration were determined by NIRS prediction based on the calibration equation (Table S1). Additional details are found in the Materials and Methods Section. Least Squares Means (lsmean) for mutant and check lines were generated, and means of all variables were ranked from highest (Upper) to lowest (Lower). **Bold text** indicates values that were statistically significantly different ( $P \leq 0.20$ ) from the values of BTx623<sup>T</sup>, the line used for mutagenesis. Additional details of the statistical analysis are described in the Materials and Methods section. BTx623<sup>N</sup> is the line maintained by ARS in Lincoln, NE, which was included for comparison.

**Table S5. NIRS prediction for Total Ash, Crude Protein and Total Carbon of the *bmr* mutant lines.**

| Line                | Ash (%)      |              |              | Crude Protein (%) |             |              | Total Carbon (%) |              |              |
|---------------------|--------------|--------------|--------------|-------------------|-------------|--------------|------------------|--------------|--------------|
|                     | lsmean       | Lower        | Upper        | lsmean            | Lower       | Upper        | lsmean           | Lower        | Upper        |
| BTx623 <sup>T</sup> | 11.60        | 11.13        | 12.06        | 5.46              | 4.19        | 6.73         | 43.28            | 43.09        | 43.47        |
| BTx623 <sup>N</sup> | 11.72        | 11.25        | 12.20        | 5.76              | 4.50        | 7.02         | 43.29            | 43.09        | 43.48        |
| RTx430              | 10.94        | 10.49        | 11.39        | 6.86              | 5.58        | 8.14         | <b>44.03</b>     | <b>43.84</b> | <b>44.21</b> |
| BWheatland          | 12.43        | 11.97        | 12.88        | 7.21              | 5.94        | 8.49         | 43.06            | 42.87        | 43.24        |
| BTx623 <i>bmr6</i>  | <b>14.52</b> | <b>14.03</b> | <b>15.01</b> | 6.10              | 4.85        | 7.36         | <b>41.85</b>     | <b>41.65</b> | <b>42.05</b> |
| BTx623 <i>bmr12</i> | 12.12        | 11.63        | 12.62        | 6.95              | 5.70        | 8.21         | 43.22            | 43.02        | 43.42        |
| OK11 <i>bmr2</i>    | <b>12.59</b> | <b>12.13</b> | <b>13.06</b> | 6.66              | 5.39        | 7.93         | <b>42.82</b>     | <b>42.63</b> | <b>43.01</b> |
| <i>bmr2-2</i>       | 11.14        | 10.68        | 11.61        | 5.30              | 4.03        | 6.56         | 43.31            | 43.12        | 43.50        |
| <i>bmr6-23</i>      | 12.28        | 11.84        | 12.71        | 7.19              | 5.90        | 8.49         | 43.03            | 42.85        | 43.21        |
| <i>bmr6-31</i>      | 11.33        | 10.89        | 11.77        | 7.59              | 6.31        | 8.88         | 43.19            | 43.01        | 43.37        |
| <i>bmr6-32</i>      | 10.85        | 10.38        | 11.31        | 6.98              | 5.71        | 8.25         | 43.63            | 43.45        | 43.82        |
| <i>bmr6-45</i>      | <b>10.59</b> | <b>10.15</b> | <b>11.03</b> | 5.90              | 4.62        | 7.19         | 43.24            | 43.06        | 43.42        |
| <i>bmr6-307</i>     | <b>13.26</b> | <b>12.77</b> | <b>13.75</b> | <b>8.48</b>       | <b>7.22</b> | <b>9.74</b>  | <b>42.48</b>     | <b>42.28</b> | <b>42.68</b> |
| <i>bmr6-741</i>     | 11.54        | 11.09        | 11.99        | 6.03              | 4.75        | 7.30         | 43.12            | 42.93        | 43.31        |
| <i>bmr6-971</i>     | 11.91        | 11.43        | 12.39        | 6.32              | 5.06        | 7.58         | 43.00            | 42.80        | 43.19        |
| <i>bmr6-1103</i>    | 11.66        | 11.19        | 12.14        | 6.21              | 4.95        | 7.47         | 43.04            | 42.85        | 43.24        |
| <i>bmr6-1277</i>    | <b>13.33</b> | <b>12.89</b> | <b>13.77</b> | 7.03              | 5.74        | 8.31         | 43.17            | 42.98        | 43.35        |
| <i>bmr12-30</i>     | 10.78        | 10.30        | 11.26        | <b>8.04</b>       | <b>6.78</b> | <b>9.30</b>  | <b>43.71</b>     | <b>43.51</b> | <b>43.90</b> |
| <i>bmr12-34</i>     | <b>9.76</b>  | <b>9.27</b>  | <b>10.25</b> | 6.58              | 5.32        | 7.83         | <b>44.10</b>     | <b>43.90</b> | <b>44.30</b> |
| <i>bmr12-35</i>     | <b>10.26</b> | <b>9.78</b>  | <b>10.74</b> | 5.22              | 3.96        | 6.48         | <b>43.94</b>     | <b>43.75</b> | <b>44.13</b> |
| <i>bmr12-820</i>    | <b>9.85</b>  | <b>9.31</b>  | <b>10.39</b> | 7.57              | 6.32        | 8.81         | 43.68            | 43.46        | 43.89        |
| <i>bmr29</i>        | 10.81        | 10.34        | 11.27        | 6.21              | 4.95        | 7.48         | <b>43.83</b>     | <b>43.64</b> | <b>44.02</b> |
| <i>bmr30</i>        | <b>10.53</b> | <b>10.02</b> | <b>11.03</b> | 7.63              | 6.38        | 8.88         | <b>43.84</b>     | <b>43.64</b> | <b>44.04</b> |
| <i>bmr31</i>        | 11.22        | 10.72        | 11.72        | <b>9.72</b>       | <b>8.47</b> | <b>10.98</b> | 43.27            | 43.07        | 43.47        |
| <i>bmr32-1</i>      | <b>7.92</b>  | <b>7.45</b>  | <b>8.38</b>  | 5.22              | 3.95        | 6.50         | <b>44.65</b>     | <b>44.46</b> | <b>44.84</b> |
| <i>bmr32-2</i>      | <b>9.86</b>  | <b>9.39</b>  | <b>10.32</b> | 5.89              | 4.62        | 7.16         | <b>44.09</b>     | <b>43.90</b> | <b>44.28</b> |
| <i>bmr32-3</i>      | <b>10.43</b> | <b>9.96</b>  | <b>10.89</b> | <b>8.23</b>       | <b>6.96</b> | <b>9.49</b>  | <b>43.77</b>     | <b>43.58</b> | <b>43.96</b> |
| 4                   | 11.50        | 11.02        | 11.98        | 7.20              | 5.94        | 8.46         | 43.47            | 43.28        | 43.67        |
| 25                  | <b>7.41</b>  | <b>6.90</b>  | <b>7.91</b>  | 4.97              | 3.72        | 6.22         | <b>44.48</b>     | <b>44.28</b> | <b>44.68</b> |
| 39                  | <b>10.49</b> | <b>9.98</b>  | <b>10.99</b> | 7.83              | 6.58        | 9.08         | <b>43.94</b>     | <b>43.73</b> | <b>44.14</b> |
| 40                  | 12.23        | 11.75        | 12.70        | 6.93              | 5.67        | 8.19         | 43.28            | 43.08        | 43.47        |
| 41                  | 10.80        | 10.32        | 11.27        | 6.11              | 4.86        | 7.37         | 43.47            | 43.27        | 43.66        |
| 163                 | <b>10.18</b> | <b>9.70</b>  | <b>10.66</b> | 6.03              | 4.77        | 7.29         | <b>43.99</b>     | <b>43.80</b> | <b>44.18</b> |
| 247                 | 12.14        | 11.62        | 12.66        | <b>9.94</b>       | <b>8.69</b> | <b>11.19</b> | 43.39            | 43.18        | 43.60        |
| 371                 | 11.12        | 10.64        | 11.59        | 5.00              | 3.74        | 6.26         | 43.59            | 43.40        | 43.78        |
| 372                 | 11.36        | 10.89        | 11.84        | 6.35              | 5.09        | 7.61         | 43.40            | 43.21        | 43.59        |
| 485                 | <b>10.14</b> | <b>9.67</b>  | <b>10.60</b> | 4.47              | 3.20        | 5.74         | 43.49            | 43.31        | 43.68        |
| 492                 | <b>9.31</b>  | <b>8.81</b>  | <b>9.82</b>  | 6.60              | 5.35        | 7.85         | <b>44.14</b>     | <b>43.94</b> | <b>44.34</b> |



|      |              |              |              |             |             |              |              |              |              |
|------|--------------|--------------|--------------|-------------|-------------|--------------|--------------|--------------|--------------|
| 557  | 10.87        | 10.40        | 11.35        | 7.48        | 6.22        | 8.74         | 43.48        | 43.28        | 43.67        |
| 666  | <b>8.29</b>  | <b>7.84</b>  | <b>8.75</b>  | 4.95        | 3.67        | 6.23         | <b>44.87</b> | <b>44.68</b> | <b>45.05</b> |
| 706  | 11.07        | 10.61        | 11.54        | 7.68        | 6.42        | 8.95         | 43.20        | 43.01        | 43.39        |
| 924  | 12.18        | 11.72        | 12.65        | 7.27        | 6.00        | 8.54         | <b>43.70</b> | <b>43.51</b> | <b>43.89</b> |
| 934  | 11.70        | 11.25        | 12.15        | <b>9.04</b> | <b>7.77</b> | <b>10.32</b> | 43.46        | 43.27        | 43.64        |
| 1057 | 11.63        | 11.16        | 12.09        | 7.03        | 5.77        | 8.30         | 43.13        | 42.94        | 43.32        |
| 1074 | 11.24        | 10.77        | 11.72        | 5.90        | 4.64        | 7.16         | 43.20        | 43.01        | 43.39        |
| 1402 | <b>9.65</b>  | <b>9.17</b>  | <b>10.13</b> | 6.31        | 5.05        | 7.57         | 43.66        | 43.47        | 43.86        |
| 1492 | 10.67        | 10.16        | 11.17        | 6.96        | 5.71        | 8.21         | 43.63        | 43.43        | 43.84        |
| 1593 | <b>10.31</b> | <b>9.88</b>  | <b>10.74</b> | <b>9.06</b> | <b>7.76</b> | <b>10.35</b> | 43.60        | 43.42        | 43.78        |
| 1605 | <b>9.82</b>  | <b>9.39</b>  | <b>10.25</b> | 6.13        | 4.83        | 7.42         | <b>43.85</b> | <b>43.67</b> | <b>44.03</b> |
| 1614 | 12.12        | 11.65        | 12.60        | 6.80        | 5.54        | 8.06         | 43.14        | 42.94        | 43.33        |
| 1634 | <b>10.53</b> | <b>10.05</b> | <b>11.00</b> | 7.41        | 6.15        | 8.67         | 43.53        | 43.34        | 43.73        |
| 1668 | <b>10.24</b> | <b>9.75</b>  | <b>10.73</b> | 7.24        | 5.98        | 8.49         | 43.66        | 43.46        | 43.85        |
| 1827 | <b>9.63</b>  | <b>9.16</b>  | <b>10.09</b> | 5.14        | 3.87        | 6.41         | <b>43.73</b> | <b>43.54</b> | <b>43.92</b> |

Values for ash, crude protein and total carbon were determined by NIRS prediction based on the calibration equation (Table S1). Additional details are found in the Materials and Methods Section. Least Squares Means (lsmean) for mutant and check lines were generated, and means of all variables were ranked from highest (Upper) to lowest (Lower). **Bold text** indicates values that were statistically significantly different ( $P \leq 0.20$ ) from the values of BTx623<sup>T</sup>, the line used for mutagenesis. Additional details of the statistical analysis are described in the Materials and Methods section. BTx623<sup>N</sup> is the line maintained by ARS in Lincoln, NE, which was included for comparison.

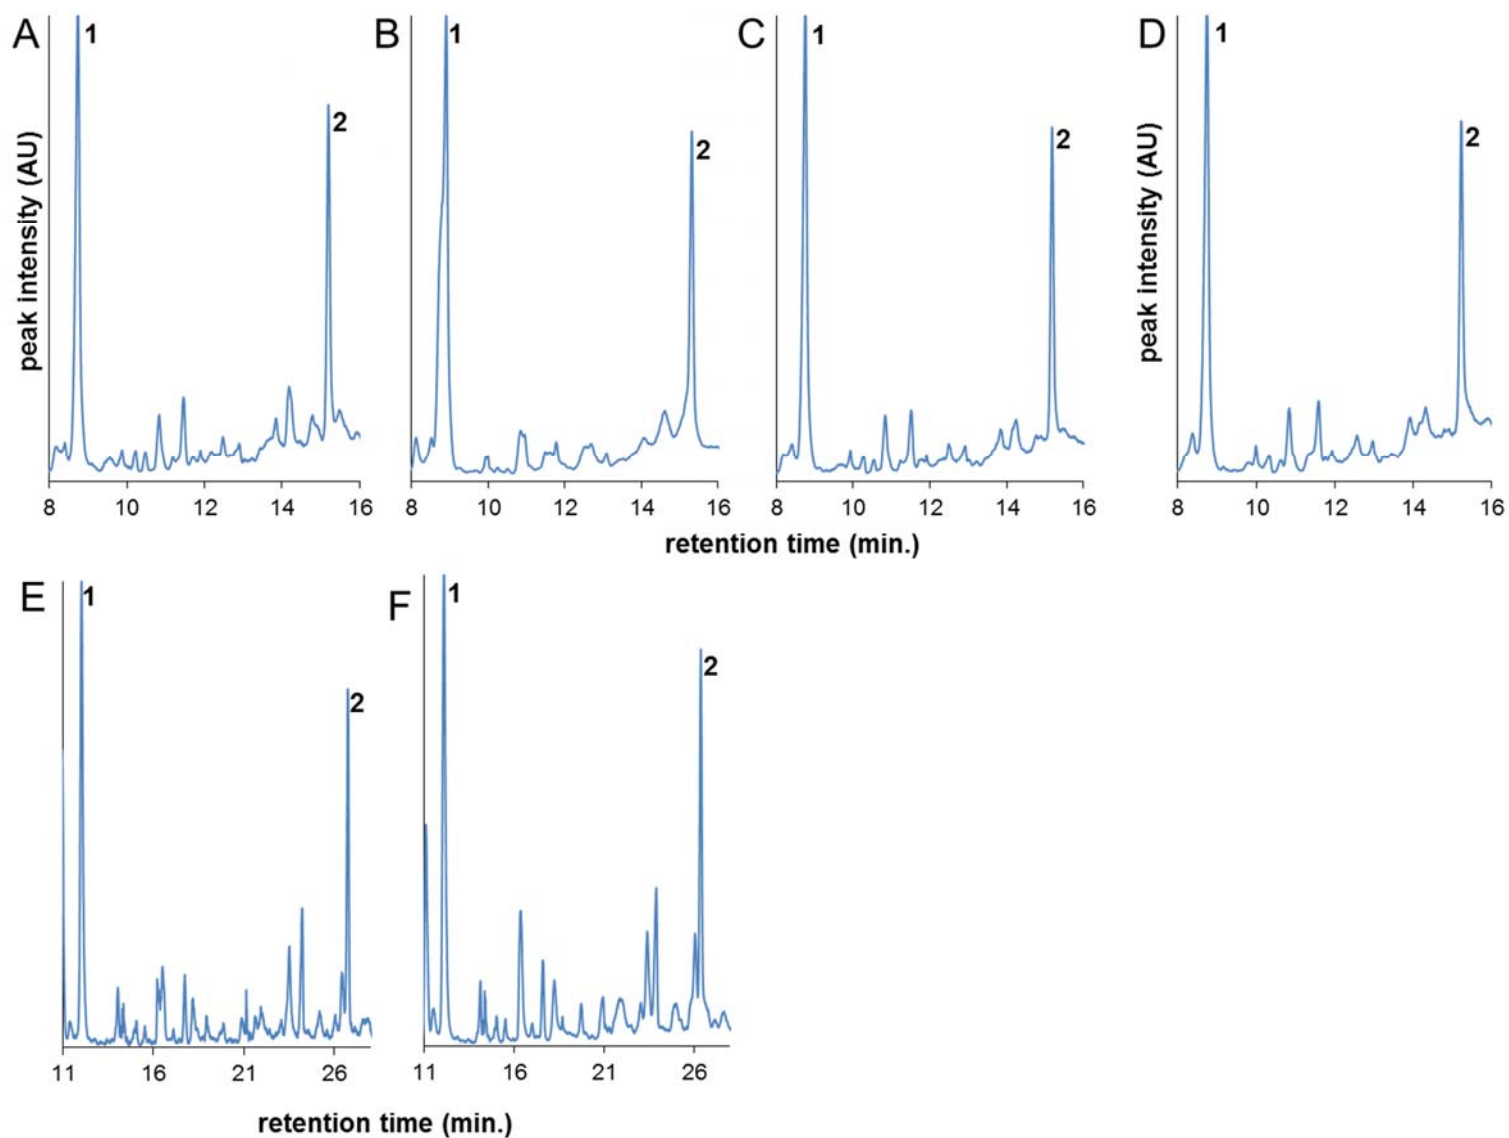

**Figure S1** Partial pyrograms obtained with stover from **A.** BTx623, **B.** *bmr30*, **C.** *bmr31*, **D.** *bmr32-1*, **E.** BTx623, and **F.** *bmr29*. Peaks **1** and **2** represent 2-methoxy-4-methyl phenol ( $m/z$  138, 123; derived from guaiacyl residues) and 2,6-dimethoxy-4-methyl phenol ( $m/z$  168, 153; derived from syringyl residues). The difference in retention times between A-D and E, F reflects the slower ramp rate during gas chromatography of the latter two samples, to improve resolution.
