# Supplementary material for: Characterization of Novel Sorghum brown midrib Mutants from an EMS-Mutagenized Population
Source: PubMed Central journal article supplement (PMC4232537; doi:10.1534/g3.114.014001), 2014-09-02
Supplement: supp_g3.114.014001_TableS1.pdf [file supp_g3.114.014001_TableS1.pdf]

**Table S1. Calibration statistics for NIRS<sup>†</sup> prediction of CP, NDF, ADF, ADL, Ash, and Total Carbon.**

| Trait           | Math treatment <sup>‡</sup> | Calibration<br>R <sup>2</sup> | SEC                           | SECV  | SEP   | Validation<br>R <sup>2</sup> |
|-----------------|-----------------------------|-------------------------------|-------------------------------|-------|-------|------------------------------|
|                 |                             |                               | -----g kg <sup>-1</sup> ----- |       |       |                              |
| CP              | 2,8,6,1                     | 0.989                         | 0.228                         | 0.303 | 0.517 | 0.982                        |
| NDF             | 4,10,10,1                   | 0.939                         | 1.371                         | 1.563 | 2.231 | 0.882                        |
| ADF             | 3,10,10,1                   | 0.955                         | 0.852                         | 1.107 | 1.164 | 0.931                        |
| ADL             | 3,5,5,1                     | 0.882                         | 0.373                         | 0.606 | 0.577 | 0.805                        |
| Ash             | 3,10,10,1                   | 0.963                         | 0.476                         | 0.662 | 0.449 | 0.937                        |
| Total<br>Carbon | 3,5,5,1                     | 0.918                         | 0.277                         | 0.517 | 0.192 | 0.922                        |

<sup>†</sup>Abbreviations: NIRS=near-infrared spectroscopy, CP=crude protein, NDF=neutral detergent fiber, ADF=acid detergent fiber, ADL=acid detergent lignin, SEC=standard error calibration, SECV=standard error cross validation, SEP=Standard Error of Prediction of validation set.

<sup>‡</sup>Math treatments used by NIRS software = derivative number, gap (nm over which derivative is calculated), smooth (number of points over which data is smoothed), second smooth (number of points).
