# Supplementary material for: Characterization of Novel Sorghum brown midrib Mutants from an EMS-Mutagenized Population
Source: PubMed Central journal article supplement (PMC4232537; doi:10.1534/g3.114.014001), 2014-09-02
Supplement: supp_g3.114.014001_TableS2.pdf [file supp_g3.114.014001_TableS2.pdf]

**Table S2. Midrib phenotype and genotypes of 26 non-*bmr* lines based on results of test crosses with *bmr2*, *bmr6*, and *bmr12* tester lines.**

| Line | Mutant Phenotype | Tester Line          |                             |                              | Mutant locus |
|------|------------------|----------------------|-----------------------------|------------------------------|--------------|
|      |                  | AOK11<br><i>bmr2</i> | AN603 ATx623<br><i>bmr6</i> | AN604 ATx623<br><i>bmr12</i> |              |
| 4    | WT               | WT                   | WT                          | WT                           |              |
| 25   | WT               | WT                   | WT                          | WT                           |              |
| 39   | WT               | -                    | WT                          | WT                           |              |
| 40   | WT               | WT                   | WT                          | WT                           |              |
| 41   | <i>bmr</i>       | WT                   | WT                          | WEAK                         | inconclusive |
| 163  | WT               | WT                   | WT                          | WT                           |              |
| 247  | WT               | WT                   | WT                          | WT                           |              |
| 371  | WT               | WT                   | WT                          | WT                           |              |
| 372  | WT               | WT                   | WT                          | WT                           |              |
| 485  | WT               | WT                   | WT                          | WT                           |              |
| 492  | WT               | WT                   | WT                          | WT                           |              |
| 557  | WT               | WT                   | WT                          | WT                           |              |
| 666  | WEAK             | WT                   | WT                          | WT                           | inconclusive |
| 706  | WT               | WT                   | WEAK                        | WT                           | inconclusive |
| 924  | WT               | WT                   | WT                          | WT                           |              |
| 934  | WT               | WT                   | WT                          | WT                           |              |
| 1057 | WT               | WT                   | WT                          | WT                           |              |
| 1074 | WT               | WT                   | WT                          | WT                           |              |
| 1402 | WT               | WT                   | WT                          | WT                           |              |
| 1492 | WT               | WT                   | WT                          | WT                           |              |
| 1593 | WT               | WT                   | WT                          | WT                           |              |
| 1605 | WT               | WT                   | WT                          | WT                           |              |
| 1614 | WT               | WT                   | WT                          | WT                           |              |
| 1634 | WT               | WT                   | WT                          | WT                           |              |
| 1668 | WT               | WT                   | WT                          | WT                           |              |
| 1827 | WT               | WT                   | WT                          | WT                           |              |

The F<sub>1</sub> individuals, mutant lines, and check lines were visually classified as being *brown midrib* (*bmr*) or wild-type (WT) phenotype (See Materials and Methods). Based upon the test-crosses, loci and alleles were designated, which appear in the far right column.
