# Supplementary material for: Characterization of Novel Sorghum brown midrib Mutants from an EMS-Mutagenized Population
Source: PubMed Central journal article supplement (PMC4232537; doi:10.1534/g3.114.014001), 2014-09-02
Supplement: supp_g3.114.014001_TableS3.pdf [file supp_g3.114.014001_TableS3.pdf]

**Table S3. Evaluation of the agronomic traits for the mutant lines**

| Line                | Stand Count (plants/m) |             |              | Time to 50% Anthesis<br>(days after planting) |       |        | Height (cm)   |              |               | Yield (T/ha) |              |              |
|---------------------|------------------------|-------------|--------------|-----------------------------------------------|-------|--------|---------------|--------------|---------------|--------------|--------------|--------------|
|                     | Ismean                 | Lower       | Upper        | Ismean                                        | Lower | Upper  | Ismean        | Lower        | Upper         | Ismean       | Lower        | Upper        |
| BTx623 <sup>T</sup> | 14.13                  | 10.31       | 17.94        | 73.38                                         | 52.66 | 94.09  | 153.13        | 135.79       | 170.46        | 17.50        | 16.07        | 18.94        |
| BTx623 <sup>N</sup> | 16.63                  | 12.95       | 20.30        | 72.75                                         | 52.28 | 93.22  | 148.13        | 128.63       | 167.62        | 17.26        | 14.19        | 20.34        |
| RTx430              | 13.13                  | 9.49        | 16.76        | 75.75                                         | 55.17 | 96.34  | 123.75        | 103.13       | 144.37        | 16.63        | 14.83        | 18.44        |
| BWheatland          | 14.75                  | 10.51       | 18.99        | 73.88                                         | 53.38 | 94.37  | <b>110.63</b> | <b>90.74</b> | <b>130.51</b> | 13.71        | 12.34        | 15.08        |
| BTx623 <i>bmr6</i>  | 17.38                  | 13.07       | 21.68        | 74.00                                         | 53.31 | 94.69  | 125.00        | 105.47       | 144.53        | 13.66        | 10.59        | 16.72        |
| BTx623 <i>bmr12</i> | 15.75                  | 12.03       | 19.47        | 76.63                                         | 56.57 | 96.68  | 131.88        | 111.06       | 152.69        | 15.72        | 14.09        | 17.35        |
| OK11 <i>bmr2</i>    | 15.13                  | 11.48       | 18.77        | 78.00                                         | 57.39 | 98.61  | 120.00        | 101.98       | 138.02        | <b>12.02</b> | <b>10.09</b> | <b>13.94</b> |
| <i>bmr2-2</i>       | 10.00                  | 6.26        | 13.74        | 78.88                                         | 58.83 | 98.92  | 128.13        | 108.97       | 147.28        | <b>7.12</b>  | <b>6.15</b>  | <b>8.09</b>  |
| <i>bmr6-23</i>      | 15.13                  | 11.24       | 19.01        | 78.50                                         | 58.65 | 98.35  | <b>96.25</b>  | <b>79.52</b> | <b>112.98</b> | <b>5.23</b>  | <b>4.25</b>  | <b>6.21</b>  |
| <i>bmr6-31</i>      | 10.50                  | 6.85        | 14.15        | 77.50                                         | 57.40 | 97.60  | <b>108.13</b> | <b>91.65</b> | <b>124.60</b> | <b>5.20</b>  | <b>4.23</b>  | <b>6.17</b>  |
| <i>bmr6-32</i>      | 12.88                  | 9.25        | 16.50        | 78.00                                         | 57.60 | 98.40  | 115.63        | 94.34        | 136.91        | <b>9.76</b>  | <b>8.68</b>  | <b>10.83</b> |
| <i>bmr6-45</i>      | 10.63                  | 7.01        | 14.24        | 78.13                                         | 57.73 | 98.52  | <b>114.38</b> | <b>94.17</b> | <b>134.58</b> | <b>6.17</b>  | <b>5.16</b>  | <b>7.18</b>  |
| <i>bmr6-307</i>     | <b>6.25</b>            | <b>2.47</b> | <b>10.03</b> | 81.63                                         | 61.29 | 101.96 | <b>112.50</b> | <b>94.06</b> | <b>130.94</b> | <b>3.48</b>  | <b>1.99</b>  | <b>4.96</b>  |
| <i>bmr6-741</i>     | 16.50                  | 12.86       | 20.14        | 79.50                                         | 59.11 | 99.89  | 128.13        | 108.96       | 147.29        | <b>10.53</b> | <b>9.11</b>  | <b>11.96</b> |
| <i>bmr6-971</i>     | 14.88                  | 11.02       | 18.73        | 79.00                                         | 58.69 | 99.31  | 125.00        | 105.80       | 144.20        | <b>11.72</b> | <b>10.47</b> | <b>12.98</b> |
| <i>bmr6-1103</i>    | 13.13                  | 9.36        | 16.89        | 79.13                                         | 59.06 | 99.19  | <b>91.88</b>  | <b>71.92</b> | <b>111.83</b> | <b>8.26</b>  | <b>6.88</b>  | <b>9.64</b>  |
| <i>bmr6-1277</i>    | 10.75                  | 6.40        | 15.10        | 76.88                                         | 56.53 | 97.22  | <b>104.38</b> | <b>83.20</b> | <b>125.55</b> | <b>7.95</b>  | <b>6.66</b>  | <b>9.24</b>  |
| <i>bmr12-30</i>     | 8.50                   | 4.83        | 12.17        | 86.63                                         | 66.48 | 106.77 | 118.75        | 101.52       | 135.98        | <b>6.51</b>  | <b>5.48</b>  | <b>7.54</b>  |
| <i>bmr12-34</i>     | 12.88                  | 8.96        | 16.79        | 82.83                                         | 62.43 | 103.23 | 133.13        | 115.58       | 150.67        | <b>8.45</b>  | <b>7.40</b>  | <b>9.49</b>  |
| <i>bmr12-35</i>     | 16.25                  | 12.48       | 20.02        | 74.13                                         | 53.57 | 94.68  | 132.50        | 112.12       | 152.88        | <b>12.95</b> | <b>11.51</b> | <b>14.38</b> |
| <i>bmr12-820</i>    | 11.21                  | 7.49        | 14.93        | 89.37                                         | 71.06 | 107.67 | 126.83        | 107.39       | 146.26        | <b>4.83</b>  | <b>3.53</b>  | <b>6.13</b>  |
| <i>bmr29</i>        | 12.25                  | 8.33        | 16.17        | 75.50                                         | 54.86 | 96.14  | 133.13        | 116.21       | 150.04        | <b>7.30</b>  | <b>6.34</b>  | <b>8.27</b>  |
| <i>bmr30</i>        | <b>5.25</b>            | <b>0.57</b> | <b>9.93</b>  | 84.00                                         | 64.28 | 103.72 | 128.75        | 111.38       | 146.12        | <b>4.77</b>  | <b>3.53</b>  | <b>6.00</b>  |
| <i>bmr31</i>        | 9.21                   | 5.22        | 13.20        | 84.87                                         | 65.34 | 104.39 | <b>69.33</b>  | <b>52.75</b> | <b>85.91</b>  | <b>2.30</b>  | <b>-0.43</b> | <b>5.03</b>  |
| <i>bmr32-1</i>      | 7.88                   | 3.84        | 11.91        | 82.25                                         | 62.52 | 101.98 | 126.88        | 109.42       | 144.33        | <b>6.91</b>  | <b>4.97</b>  | <b>8.86</b>  |
| <i>bmr32-2</i>      | 11.88                  | 8.15        | 15.60        | 76.13                                         | 55.43 | 96.82  | <b>115.00</b> | <b>97.51</b> | <b>132.49</b> | <b>8.26</b>  | <b>7.26</b>  | <b>9.27</b>  |
| <i>bmr32-3</i>      | <b>6.25</b>            | <b>2.46</b> | <b>10.04</b> | 82.75                                         | 63.49 | 102.01 | 117.50        | 97.39        | 137.61        | <b>3.49</b>  | <b>1.69</b>  | <b>5.29</b>  |
| 4                   | 12.25                  | 8.61        | 15.89        | 78.13                                         | 57.62 | 98.63  | 125.63        | 106.95       | 144.30        | <b>9.99</b>  | <b>8.89</b>  | <b>11.09</b> |
| 25                  | 11.88                  | 8.23        | 15.52        | 87.40                                         | 69.54 | 105.26 | 148.13        | 131.07       | 165.18        | <b>9.75</b>  | <b>7.53</b>  | <b>11.96</b> |
| 39                  | 8.00                   | 4.05        | 11.95        | 84.50                                         | 63.84 | 105.16 | <b>100.63</b> | <b>82.12</b> | <b>119.13</b> | <b>6.63</b>  | <b>5.34</b>  | <b>7.92</b>  |
| 40                  | 8.63                   | 4.92        | 12.33        | 78.75                                         | 58.25 | 99.25  | 126.88        | 106.25       | 147.50        | <b>10.62</b> | <b>9.55</b>  | <b>11.69</b> |
| 41                  | 13.75                  | 10.03       | 17.47        | 75.50                                         | 55.20 | 95.80  | 116.88        | 97.06        | 136.69        | <b>9.71</b>  | <b>8.71</b>  | <b>10.70</b> |
| 163                 | 17.38                  | 13.69       | 21.06        | 80.75                                         | 60.29 | 101.21 | 122.50        | 102.23       | 142.77        | <b>8.61</b>  | <b>7.63</b>  | <b>9.60</b>  |
| 247                 | 6.71                   | 2.35        | 11.07        | 87.20                                         | 66.97 | 107.43 | <b>83.49</b>  | <b>65.20</b> | <b>101.79</b> | <b>2.13</b>  | <b>1.11</b>  | <b>3.14</b>  |
| 371                 | 14.00                  | 10.19       | 17.81        | 79.13                                         | 59.04 | 99.21  | 149.38        | 132.40       | 166.35        | 15.07        | 13.29        | 16.86        |
| 372                 | 6.88                   | 2.55        | 11.20        | 76.25                                         | 56.22 | 96.28  | 138.13        | 118.44       | 157.81        | <b>12.12</b> | <b>10.71</b> | <b>13.53</b> |
| 485                 | 13.38                  | 9.63        | 17.12        | 75.75                                         | 55.05 | 96.45  | 144.38        | 124.26       | 164.49        | <b>11.09</b> | <b>9.89</b>  | <b>12.28</b> |
| 492                 | 10.75                  | 7.11        | 14.39        | 85.25                                         | 65.89 | 104.61 | <b>107.50</b> | <b>87.33</b> | <b>127.67</b> | <b>5.89</b>  | <b>4.93</b>  | <b>6.84</b>  |
| 557                 | 9.75                   | 6.10        | 13.40        | 90.63                                         | 70.09 | 111.16 | 130.00        | 113.36       | 146.64        | <b>7.92</b>  | <b>6.95</b>  | <b>8.90</b>  |
| 666                 | 14.75                  | 10.92       | 18.58        | 77.75                                         | 57.44 | 98.06  | 134.38        | 113.26       | 155.49        | <b>9.48</b>  | <b>7.39</b>  | <b>11.57</b> |

|      |             |             |             |       |       |        |               |              |               |              |              |              |
|------|-------------|-------------|-------------|-------|-------|--------|---------------|--------------|---------------|--------------|--------------|--------------|
| 706  | 7.50        | 3.85        | 11.15       | 84.13 | 63.88 | 104.37 | <b>108.75</b> | <b>89.78</b> | <b>127.72</b> | <b>4.28</b>  | <b>3.10</b>  | <b>5.46</b>  |
| 924  | 15.00       | 11.35       | 18.65       | 76.13 | 55.58 | 96.67  | <b>99.38</b>  | <b>80.46</b> | <b>118.29</b> | <b>9.19</b>  | <b>7.58</b>  | <b>10.80</b> |
| 934  | 8.25        | 3.90        | 12.60       | 88.38 | 69.42 | 107.33 | <b>103.13</b> | <b>82.20</b> | <b>124.05</b> | <b>2.76</b>  | <b>0.99</b>  | <b>4.53</b>  |
| 1057 | 10.38       | 6.72        | 14.03       | 75.38 | 55.08 | 95.67  | 119.38        | 99.14        | 139.61        | <b>6.38</b>  | <b>5.43</b>  | <b>7.33</b>  |
| 1074 | 14.25       | 10.32       | 18.18       | 74.88 | 54.21 | 95.54  | 135.00        | 113.92       | 156.08        | <b>13.39</b> | <b>11.81</b> | <b>14.97</b> |
| 1402 | 9.75        | 5.81        | 13.69       | 82.38 | 62.62 | 102.13 | 117.50        | 96.89        | 138.11        | <b>6.00</b>  | <b>4.50</b>  | <b>7.51</b>  |
| 1492 | <b>4.75</b> | <b>1.06</b> | <b>8.44</b> | 79.50 | 59.00 | 100.00 | 121.25        | 100.90       | 141.60        | <b>4.45</b>  | <b>1.78</b>  | <b>7.11</b>  |
| 1593 | 13.50       | 9.01        | 17.99       | 87.71 | 68.09 | 107.32 | <b>90.63</b>  | <b>74.61</b> | <b>106.64</b> | <b>3.81</b>  | <b>2.80</b>  | <b>4.81</b>  |
| 1605 | 11.13       | 7.30        | 14.95       | 77.63 | 57.28 | 97.97  | 166.25        | 146.41       | 186.09        | <b>9.83</b>  | <b>8.51</b>  | <b>11.15</b> |
| 1614 | 11.00       | 7.18        | 14.82       | 77.13 | 56.64 | 97.61  | 128.75        | 109.01       | 148.49        | <b>8.37</b>  | <b>7.17</b>  | <b>9.58</b>  |
| 1634 | 8.13        | 4.46        | 11.79       | 86.63 | 66.51 | 106.74 | <b>99.38</b>  | <b>78.94</b> | <b>119.81</b> | <b>3.79</b>  | <b>2.84</b>  | <b>4.73</b>  |
| 1668 | 11.13       | 7.51        | 14.74       | 79.38 | 59.43 | 99.32  | <b>113.13</b> | <b>96.02</b> | <b>130.23</b> | <b>7.17</b>  | <b>6.14</b>  | <b>8.20</b>  |
| 1827 | 11.50       | 7.87        | 15.13       | 79.00 | 58.57 | 99.43  | 129.38        | 110.83       | 147.92        | <b>7.08</b>  | <b>5.80</b>  | <b>8.37</b>  |

Measurement of these traits is as described in Materials and Methods. Yield is defined as the total above ground biomass. Least Squares Means (lsmean) for mutant and check lines were generated, and means of all variables were ranked from highest (Upper) to lowest (Lower). **Bold text** indicates values that were significantly different ( $P \leq 0.20$ ) from the values of BTx623<sup>T</sup>, the line used for mutagenesis. Additional details of the statistical analysis are described in Materials and Methods. BTx623<sup>N</sup> is the line maintained by ARS in Lincoln, NE, which was included for comparison.
