# Supplementary material for: Characterization of Novel Sorghum brown midrib Mutants from an EMS-Mutagenized Population
Source: PubMed Central journal article supplement (PMC4232537; doi:10.1534/g3.114.014001), 2014-09-02
Supplement: supp_g3.114.014001_TableS4.pdf [file supp_g3.114.014001_TableS4.pdf]

**Table S4. NIRS prediction for NDF, ADF and ADL of the mutant lines**

| Line                | NDF (%)      |              |              | ADF (%)      |              |              | ADL (%)     |             |             |
|---------------------|--------------|--------------|--------------|--------------|--------------|--------------|-------------|-------------|-------------|
|                     | Ismean       | Lower        | Upper        | Ismean       | Lower        | Upper        | Ismean      | Lower       | Upper       |
| BTx623 <sup>T</sup> | 60.86        | 58.85        | 62.86        | 34.23        | 33.50        | 34.97        | 5.18        | 4.98        | 5.39        |
| BTx623 <sup>N</sup> | 61.48        | 59.48        | 63.49        | 34.52        | 33.76        | 35.28        | 5.34        | 5.13        | 5.54        |
| RTx430              | 64.41        | 62.40        | 66.42        | <b>36.41</b> | <b>35.69</b> | <b>37.13</b> | 5.11        | 4.92        | 5.31        |
| BWheatland          | 64.03        | 62.02        | 66.03        | <b>36.04</b> | <b>35.32</b> | <b>36.76</b> | 5.13        | 4.93        | 5.33        |
| BTx623 <i>bmr6</i>  | 60.76        | 58.75        | 62.76        | 33.76        | 32.97        | 34.54        | <b>4.28</b> | <b>4.07</b> | <b>4.49</b> |
| BTx623 <i>bmr12</i> | 62.68        | 60.68        | 64.69        | 34.60        | 33.81        | 35.39        | <b>4.09</b> | <b>3.88</b> | <b>4.31</b> |
| OK11 <i>bmr2</i>    | <b>64.79</b> | <b>62.78</b> | <b>66.79</b> | 35.53        | 34.79        | 36.27        | <b>4.05</b> | <b>3.85</b> | <b>4.25</b> |
| <i>bmr2-2</i>       | 58.84        | 56.84        | 60.84        | <b>31.96</b> | <b>31.22</b> | <b>32.70</b> | <b>3.67</b> | <b>3.47</b> | <b>3.88</b> |
| <i>bmr6-23</i>      | 60.84        | 58.83        | 62.85        | 32.82        | 32.13        | 33.51        | <b>4.59</b> | <b>4.40</b> | <b>4.77</b> |
| <i>bmr6-31</i>      | 59.10        | 57.09        | 61.11        | <b>31.19</b> | <b>30.49</b> | <b>31.89</b> | <b>3.77</b> | <b>3.58</b> | <b>3.97</b> |
| <i>bmr6-32</i>      | 61.02        | 59.02        | 63.02        | 33.05        | 32.31        | 33.78        | <b>3.82</b> | <b>3.62</b> | <b>4.02</b> |
| <i>bmr6-45</i>      | <b>54.98</b> | <b>52.98</b> | <b>56.99</b> | <b>29.30</b> | <b>28.60</b> | <b>30.00</b> | <b>3.72</b> | <b>3.53</b> | <b>3.91</b> |
| <i>bmr6-307</i>     | 58.15        | 56.14        | 60.15        | <b>29.13</b> | <b>28.35</b> | <b>29.91</b> | <b>4.30</b> | <b>4.09</b> | <b>4.51</b> |
| <i>bmr6-741</i>     | 59.88        | 57.87        | 61.88        | <b>32.49</b> | <b>31.77</b> | <b>33.20</b> | <b>3.92</b> | <b>3.73</b> | <b>4.12</b> |
| <i>bmr6-971</i>     | 60.14        | 58.14        | 62.15        | <b>32.59</b> | <b>31.84</b> | <b>33.35</b> | <b>3.97</b> | <b>3.77</b> | <b>4.18</b> |
| <i>bmr6-1103</i>    | 59.44        | 57.43        | 61.44        | <b>32.30</b> | <b>31.54</b> | <b>33.06</b> | <b>3.74</b> | <b>3.54</b> | <b>3.95</b> |
| <i>bmr6-1277</i>    | <b>68.66</b> | <b>66.66</b> | <b>70.67</b> | <b>38.56</b> | <b>37.87</b> | <b>39.26</b> | 5.08        | 4.89        | 5.27        |
| <i>bmr12-30</i>     | 61.02        | 59.02        | 63.03        | <b>32.40</b> | <b>31.64</b> | <b>33.16</b> | <b>3.85</b> | <b>3.64</b> | <b>4.05</b> |
| <i>bmr12-34</i>     | 61.52        | 59.52        | 63.53        | 33.25        | 32.47        | 34.03        | <b>3.75</b> | <b>3.53</b> | <b>3.96</b> |
| <i>bmr12-35</i>     | 61.80        | 59.79        | 63.80        | 33.86        | 33.11        | 34.62        | <b>4.61</b> | <b>4.41</b> | <b>4.82</b> |
| <i>bmr12-820</i>    | 58.46        | 56.44        | 60.49        | <b>31.12</b> | <b>30.25</b> | <b>31.98</b> | <b>3.37</b> | <b>3.13</b> | <b>3.60</b> |
| <i>bmr29</i>        | 64.41        | 62.41        | 66.42        | <b>37.32</b> | <b>36.58</b> | <b>38.06</b> | <b>4.65</b> | <b>4.45</b> | <b>4.85</b> |
| <i>bmr30</i>        | 61.29        | 59.28        | 63.30        | <b>32.31</b> | <b>31.51</b> | <b>33.12</b> | <b>4.50</b> | <b>4.28</b> | <b>4.72</b> |
| <i>bmr31</i>        | 60.07        | 58.06        | 62.08        | <b>31.48</b> | <b>30.67</b> | <b>32.29</b> | 4.80        | 4.58        | 5.02        |
| <i>bmr32-1</i>      | 62.34        | 60.33        | 64.34        | 33.52        | 32.78        | 34.26        | <b>4.02</b> | <b>3.82</b> | <b>4.22</b> |
| <i>bmr32-2</i>      | 63.47        | 61.47        | 65.47        | 35.15        | 34.41        | 35.89        | <b>4.34</b> | <b>4.14</b> | <b>4.54</b> |
| <i>bmr32-3</i>      | 59.89        | 57.89        | 61.90        | <b>31.37</b> | <b>30.63</b> | <b>32.10</b> | <b>4.53</b> | <b>4.33</b> | <b>4.74</b> |
| 4                   | 64.05        | 62.05        | 66.06        | <b>35.76</b> | <b>35.01</b> | <b>36.52</b> | 5.51        | 5.30        | 5.71        |
| 25                  | 56.90        | 54.90        | 58.91        | <b>30.60</b> | <b>29.79</b> | <b>31.41</b> | <b>3.64</b> | <b>3.42</b> | <b>3.86</b> |
| 39                  | 61.21        | 59.20        | 63.22        | 32.82        | 32.01        | 33.62        | 4.99        | 4.77        | 5.21        |
| 40                  | 62.45        | 60.44        | 64.45        | 34.33        | 33.57        | 35.09        | 5.47        | 5.26        | 5.68        |
| 41                  | 60.85        | 58.84        | 62.85        | 33.14        | 32.38        | 33.90        | 5.09        | 4.89        | 5.30        |
| 163                 | 62.53        | 60.53        | 64.54        | 34.63        | 33.87        | 35.38        | <b>4.77</b> | <b>4.56</b> | <b>4.98</b> |
| 247                 | 61.51        | 59.50        | 63.53        | 32.73        | 31.90        | 33.57        | 5.20        | 4.97        | 5.43        |
| 371                 | <b>64.94</b> | <b>62.93</b> | <b>66.94</b> | <b>36.61</b> | <b>35.86</b> | <b>37.37</b> | 5.41        | 5.21        | 5.62        |
| 372                 | 60.40        | 58.39        | 62.40        | <b>32.72</b> | <b>31.96</b> | <b>33.48</b> | 5.00        | 4.79        | 5.20        |
| 485                 | 59.26        | 57.26        | 61.27        | 32.88        | 32.15        | 33.62        | <b>4.47</b> | <b>4.27</b> | <b>4.68</b> |
| 492                 | 58.94        | 56.93        | 60.95        | <b>31.68</b> | <b>30.87</b> | <b>32.48</b> | <b>4.29</b> | <b>4.07</b> | <b>4.51</b> |
| 557                 | 59.61        | 57.61        | 61.62        | <b>31.87</b> | <b>31.11</b> | <b>32.63</b> | 4.78        | 4.57        | 4.98        |
| 666                 | <b>65.34</b> | <b>63.33</b> | <b>67.34</b> | <b>36.09</b> | <b>35.37</b> | <b>36.81</b> | <b>4.10</b> | <b>3.90</b> | <b>4.30</b> |

|      |              |              |              |              |              |              |             |             |             |
|------|--------------|--------------|--------------|--------------|--------------|--------------|-------------|-------------|-------------|
| 706  | 59.88        | 57.87        | 61.88        | <b>30.63</b> | <b>29.89</b> | <b>31.37</b> | 5.58        | 5.38        | 5.78        |
| 924  | <b>66.00</b> | <b>64.00</b> | <b>68.01</b> | <b>37.53</b> | <b>36.79</b> | <b>38.27</b> | <b>5.84</b> | <b>5.64</b> | <b>6.04</b> |
| 934  | 62.82        | 60.81        | 64.82        | 33.45        | 32.73        | 34.16        | 5.07        | 4.87        | 5.26        |
| 1057 | 61.66        | 59.66        | 63.67        | 33.60        | 32.86        | 34.33        | <b>4.71</b> | <b>4.51</b> | <b>4.91</b> |
| 1074 | 59.80        | 57.80        | 61.81        | 32.92        | 32.16        | 33.68        | <b>4.75</b> | <b>4.54</b> | <b>4.96</b> |
| 1402 | 57.51        | 55.51        | 59.52        | <b>30.97</b> | <b>30.21</b> | <b>31.73</b> | <b>4.23</b> | <b>4.02</b> | <b>4.44</b> |
| 1492 | 60.98        | 58.97        | 62.99        | <b>32.48</b> | <b>31.67</b> | <b>33.28</b> | 4.93        | 4.71        | 5.16        |
| 1593 | <b>55.73</b> | <b>53.72</b> | <b>57.74</b> | <b>29.59</b> | <b>28.91</b> | <b>30.27</b> | <b>4.14</b> | <b>3.95</b> | <b>4.32</b> |
| 1605 | 57.65        | 55.64        | 59.66        | <b>32.27</b> | <b>31.59</b> | <b>32.95</b> | 5.02        | 4.84        | 5.21        |
| 1614 | 62.41        | 60.41        | 64.41        | 34.75        | 34.00        | 35.51        | <b>5.72</b> | <b>5.51</b> | <b>5.92</b> |
| 1634 | 57.59        | 55.59        | 59.59        | <b>28.78</b> | <b>28.03</b> | <b>29.54</b> | 4.80        | 4.59        | 5.01        |
| 1668 | 59.55        | 57.55        | 61.56        | <b>31.57</b> | <b>30.79</b> | <b>32.35</b> | <b>4.70</b> | <b>4.49</b> | <b>4.91</b> |
| 1827 | <b>56.55</b> | <b>54.55</b> | <b>58.55</b> | <b>30.66</b> | <b>29.92</b> | <b>31.39</b> | <b>4.05</b> | <b>3.85</b> | <b>4.25</b> |

Values for neutral detergent fiber (NDF), acid detergent fiber (ADF), and acid detergent lignin (ADL) concentration were determined by NIRS prediction based on the calibration equation (Table S1). Additional details are found in the Materials and Methods Section. Least Squares Means (lsmean) for mutant and check lines were generated, and means of all variables were ranked from highest (Upper) to lowest (Lower). **Bold text** indicates values that were statistically significantly different ( $P \leq 0.20$ ) from the values of BTx623<sup>T</sup>, the line used for mutagenesis. Additional details of the statistical analysis are described in the Materials and Methods section. BTx623<sup>N</sup> is the line maintained by ARS in Lincoln, NE, which was included for comparison.
