# Supplementary material for: Characterization of Novel Sorghum brown midrib Mutants from an EMS-Mutagenized Population
Source: PubMed Central journal article supplement (PMC4232537; doi:10.1534/g3.114.014001), 2014-09-02
Supplement: supp_g3.114.014001_TableS5.pdf [file supp_g3.114.014001_TableS5.pdf]

**Table S5. NIRS prediction for Total Ash, Crude Protein and Total Carbon of the *bmr* mutant lines.**

| Line                | Ash (%)      |              |              | Crude Protein (%) |             |              | Total Carbon (%) |              |              |
|---------------------|--------------|--------------|--------------|-------------------|-------------|--------------|------------------|--------------|--------------|
|                     | lsmean       | Lower        | Upper        | lsmean            | Lower       | Upper        | lsmean           | Lower        | Upper        |
| BTx623 <sup>T</sup> | 11.60        | 11.13        | 12.06        | 5.46              | 4.19        | 6.73         | 43.28            | 43.09        | 43.47        |
| BTx623 <sup>N</sup> | 11.72        | 11.25        | 12.20        | 5.76              | 4.50        | 7.02         | 43.29            | 43.09        | 43.48        |
| RTx430              | 10.94        | 10.49        | 11.39        | 6.86              | 5.58        | 8.14         | <b>44.03</b>     | <b>43.84</b> | <b>44.21</b> |
| BWheatland          | 12.43        | 11.97        | 12.88        | 7.21              | 5.94        | 8.49         | 43.06            | 42.87        | 43.24        |
| BTx623 <i>bmr6</i>  | <b>14.52</b> | <b>14.03</b> | <b>15.01</b> | 6.10              | 4.85        | 7.36         | <b>41.85</b>     | <b>41.65</b> | <b>42.05</b> |
| BTx623 <i>bmr12</i> | 12.12        | 11.63        | 12.62        | 6.95              | 5.70        | 8.21         | 43.22            | 43.02        | 43.42        |
| OK11 <i>bmr2</i>    | <b>12.59</b> | <b>12.13</b> | <b>13.06</b> | 6.66              | 5.39        | 7.93         | <b>42.82</b>     | <b>42.63</b> | <b>43.01</b> |
| <i>bmr2-2</i>       | 11.14        | 10.68        | 11.61        | 5.30              | 4.03        | 6.56         | 43.31            | 43.12        | 43.50        |
| <i>bmr6-23</i>      | 12.28        | 11.84        | 12.71        | 7.19              | 5.90        | 8.49         | 43.03            | 42.85        | 43.21        |
| <i>bmr6-31</i>      | 11.33        | 10.89        | 11.77        | 7.59              | 6.31        | 8.88         | 43.19            | 43.01        | 43.37        |
| <i>bmr6-32</i>      | 10.85        | 10.38        | 11.31        | 6.98              | 5.71        | 8.25         | 43.63            | 43.45        | 43.82        |
| <i>bmr6-45</i>      | <b>10.59</b> | <b>10.15</b> | <b>11.03</b> | 5.90              | 4.62        | 7.19         | 43.24            | 43.06        | 43.42        |
| <i>bmr6-307</i>     | <b>13.26</b> | <b>12.77</b> | <b>13.75</b> | <b>8.48</b>       | <b>7.22</b> | <b>9.74</b>  | <b>42.48</b>     | <b>42.28</b> | <b>42.68</b> |
| <i>bmr6-741</i>     | 11.54        | 11.09        | 11.99        | 6.03              | 4.75        | 7.30         | 43.12            | 42.93        | 43.31        |
| <i>bmr6-971</i>     | 11.91        | 11.43        | 12.39        | 6.32              | 5.06        | 7.58         | 43.00            | 42.80        | 43.19        |
| <i>bmr6-1103</i>    | 11.66        | 11.19        | 12.14        | 6.21              | 4.95        | 7.47         | 43.04            | 42.85        | 43.24        |
| <i>bmr6-1277</i>    | <b>13.33</b> | <b>12.89</b> | <b>13.77</b> | 7.03              | 5.74        | 8.31         | 43.17            | 42.98        | 43.35        |
| <i>bmr12-30</i>     | 10.78        | 10.30        | 11.26        | <b>8.04</b>       | <b>6.78</b> | <b>9.30</b>  | <b>43.71</b>     | <b>43.51</b> | <b>43.90</b> |
| <i>bmr12-34</i>     | <b>9.76</b>  | <b>9.27</b>  | <b>10.25</b> | 6.58              | 5.32        | 7.83         | <b>44.10</b>     | <b>43.90</b> | <b>44.30</b> |
| <i>bmr12-35</i>     | <b>10.26</b> | <b>9.78</b>  | <b>10.74</b> | 5.22              | 3.96        | 6.48         | <b>43.94</b>     | <b>43.75</b> | <b>44.13</b> |
| <i>bmr12-820</i>    | <b>9.85</b>  | <b>9.31</b>  | <b>10.39</b> | 7.57              | 6.32        | 8.81         | 43.68            | 43.46        | 43.89        |
| <i>bmr29</i>        | 10.81        | 10.34        | 11.27        | 6.21              | 4.95        | 7.48         | <b>43.83</b>     | <b>43.64</b> | <b>44.02</b> |
| <i>bmr30</i>        | <b>10.53</b> | <b>10.02</b> | <b>11.03</b> | 7.63              | 6.38        | 8.88         | <b>43.84</b>     | <b>43.64</b> | <b>44.04</b> |
| <i>bmr31</i>        | 11.22        | 10.72        | 11.72        | <b>9.72</b>       | <b>8.47</b> | <b>10.98</b> | 43.27            | 43.07        | 43.47        |
| <i>bmr32-1</i>      | <b>7.92</b>  | <b>7.45</b>  | <b>8.38</b>  | 5.22              | 3.95        | 6.50         | <b>44.65</b>     | <b>44.46</b> | <b>44.84</b> |
| <i>bmr32-2</i>      | <b>9.86</b>  | <b>9.39</b>  | <b>10.32</b> | 5.89              | 4.62        | 7.16         | <b>44.09</b>     | <b>43.90</b> | <b>44.28</b> |
| <i>bmr32-3</i>      | <b>10.43</b> | <b>9.96</b>  | <b>10.89</b> | <b>8.23</b>       | <b>6.96</b> | <b>9.49</b>  | <b>43.77</b>     | <b>43.58</b> | <b>43.96</b> |
| 4                   | 11.50        | 11.02        | 11.98        | 7.20              | 5.94        | 8.46         | 43.47            | 43.28        | 43.67        |
| 25                  | <b>7.41</b>  | <b>6.90</b>  | <b>7.91</b>  | 4.97              | 3.72        | 6.22         | <b>44.48</b>     | <b>44.28</b> | <b>44.68</b> |
| 39                  | <b>10.49</b> | <b>9.98</b>  | <b>10.99</b> | 7.83              | 6.58        | 9.08         | <b>43.94</b>     | <b>43.73</b> | <b>44.14</b> |
| 40                  | 12.23        | 11.75        | 12.70        | 6.93              | 5.67        | 8.19         | 43.28            | 43.08        | 43.47        |
| 41                  | 10.80        | 10.32        | 11.27        | 6.11              | 4.86        | 7.37         | 43.47            | 43.27        | 43.66        |
| 163                 | <b>10.18</b> | <b>9.70</b>  | <b>10.66</b> | 6.03              | 4.77        | 7.29         | <b>43.99</b>     | <b>43.80</b> | <b>44.18</b> |
| 247                 | 12.14        | 11.62        | 12.66        | <b>9.94</b>       | <b>8.69</b> | <b>11.19</b> | 43.39            | 43.18        | 43.60        |
| 371                 | 11.12        | 10.64        | 11.59        | 5.00              | 3.74        | 6.26         | 43.59            | 43.40        | 43.78        |
| 372                 | 11.36        | 10.89        | 11.84        | 6.35              | 5.09        | 7.61         | 43.40            | 43.21        | 43.59        |
| 485                 | <b>10.14</b> | <b>9.67</b>  | <b>10.60</b> | 4.47              | 3.20        | 5.74         | 43.49            | 43.31        | 43.68        |
| 492                 | <b>9.31</b>  | <b>8.81</b>  | <b>9.82</b>  | 6.60              | 5.35        | 7.85         | <b>44.14</b>     | <b>43.94</b> | <b>44.34</b> |

|      |              |              |              |             |             |              |              |              |              |
|------|--------------|--------------|--------------|-------------|-------------|--------------|--------------|--------------|--------------|
| 557  | 10.87        | 10.40        | 11.35        | 7.48        | 6.22        | 8.74         | 43.48        | 43.28        | 43.67        |
| 666  | <b>8.29</b>  | <b>7.84</b>  | <b>8.75</b>  | 4.95        | 3.67        | 6.23         | <b>44.87</b> | <b>44.68</b> | <b>45.05</b> |
| 706  | 11.07        | 10.61        | 11.54        | 7.68        | 6.42        | 8.95         | 43.20        | 43.01        | 43.39        |
| 924  | 12.18        | 11.72        | 12.65        | 7.27        | 6.00        | 8.54         | <b>43.70</b> | <b>43.51</b> | <b>43.89</b> |
| 934  | 11.70        | 11.25        | 12.15        | <b>9.04</b> | <b>7.77</b> | <b>10.32</b> | 43.46        | 43.27        | 43.64        |
| 1057 | 11.63        | 11.16        | 12.09        | 7.03        | 5.77        | 8.30         | 43.13        | 42.94        | 43.32        |
| 1074 | 11.24        | 10.77        | 11.72        | 5.90        | 4.64        | 7.16         | 43.20        | 43.01        | 43.39        |
| 1402 | <b>9.65</b>  | <b>9.17</b>  | <b>10.13</b> | 6.31        | 5.05        | 7.57         | 43.66        | 43.47        | 43.86        |
| 1492 | 10.67        | 10.16        | 11.17        | 6.96        | 5.71        | 8.21         | 43.63        | 43.43        | 43.84        |
| 1593 | <b>10.31</b> | <b>9.88</b>  | <b>10.74</b> | <b>9.06</b> | <b>7.76</b> | <b>10.35</b> | 43.60        | 43.42        | 43.78        |
| 1605 | <b>9.82</b>  | <b>9.39</b>  | <b>10.25</b> | 6.13        | 4.83        | 7.42         | <b>43.85</b> | <b>43.67</b> | <b>44.03</b> |
| 1614 | 12.12        | 11.65        | 12.60        | 6.80        | 5.54        | 8.06         | 43.14        | 42.94        | 43.33        |
| 1634 | <b>10.53</b> | <b>10.05</b> | <b>11.00</b> | 7.41        | 6.15        | 8.67         | 43.53        | 43.34        | 43.73        |
| 1668 | <b>10.24</b> | <b>9.75</b>  | <b>10.73</b> | 7.24        | 5.98        | 8.49         | 43.66        | 43.46        | 43.85        |
| 1827 | <b>9.63</b>  | <b>9.16</b>  | <b>10.09</b> | 5.14        | 3.87        | 6.41         | <b>43.73</b> | <b>43.54</b> | <b>43.92</b> |

Values for ash, crude protein and total carbon were determined by NIRS prediction based on the calibration equation (Table S1). Additional details are found in the Materials and Methods Section. Least Squares Means (lsmean) for mutant and check lines were generated, and means of all variables were ranked from highest (Upper) to lowest (Lower). **Bold text** indicates values that were statistically significantly different ( $P \leq 0.20$ ) from the values of BTx623<sup>T</sup>, the line used for mutagenesis. Additional details of the statistical analysis are described in the Materials and Methods section. BTx623<sup>N</sup> is the line maintained by ARS in Lincoln, NE, which was included for comparison.
